# Supplementary material for: Focus on Comfort - The effect of focus language on postoperative hospital stay compared to the NRS in children receiving postoperative care – A before-after study
Source: Research Square preprint supplement (doi:10.21203/rs.3.rs-8428158/v1), 2026-01-12
Supplement: Supplementary file 1 [file 065fdb8d76dc61c3ee103fae.docx]

**Supplementary tables and figures**

**Table 1 - Additional subgroup analyses**

Additional statistical analyses were performed to explore whether focus language affected subgroups differently regarding LOS. The subgroups explored: patients with psychiatric problems or chronic conditions associated with chronic pain, patients without psychiatric problems or chronic conditions associated with chronic pain, patients aged 6-11 years, patients aged 12-18 years, patients with complications and patients without complications.

|  | **Pre-intervention group - NRS** | | | **Post-intervention group - Focus language** | | |  |  |
| --- | --- | --- | --- | --- | --- | --- | --- | --- |
|  | N (%) | Median | IQR# | N (%) | Median | IQR# | W-value1 | P-value2 |
| LOS for patients with psychiatric problems or a chronic condition  (in hours) | 15  (16.13) | 172.0 | [150.0; 193.0] | 24  (24.24) | 157.0 | [112.5; 222.5] | 180.5 | 1 |
| LOS for patients without psychiatric problems or a chronic condition  (in hours) | 78  (83.87) | 78.50 | [47.25; 114.25] | 75  (75.76) | 100.0 | [69.5; 166.5] | 2139.5 | *<0.01* |
| LOS for patients aged  6-11 years  (in hours) | 29  (31.18) | 95.0 | [50.0; 169.0] | 20  (20.20) | 75.5 | [67.5; 117.8] | 298.5 | 0.87 |
| LOS for patients aged 12 years and older  (in hours) | 64  (68.82) | 82.0 | [48.5; 144.2] | 79  (79.80) | 141.0 | [73; 154.2] | 1717.5 | *<0.01* |
| LOS for patients with complications (in hours) | 7  (7.53) | 167.0 | [107.5; 248.5] | 13  (13.13) | 257.0 | [213.0; 389.0] | 26 | 0.13 |
| LOS for patients without complications (in hours) | 86  (92.47) | 90.50 | [48.25; 142.75] | 86  (86.87) | 107.5 | [70.0; 164.0] | 2947.5 | 0.02 |

#IQR = Interquartile range

1 W-value of the Wilcoxon Rank sum test

2 A p-value <0.05 was considered statistically significant.

**Table 2 – Supplementary results regarding types of surgical procedures per group**

| **Types of surgical procedures** | **Pre-intervention**  **(n)** | **Mean LOS* (hours)** | **Post-intervention**  **(n)** | **Mean LOS* (hours)** |
| --- | --- | --- | --- | --- |
| Cholecystectomy | 4 | 36.25 | 2 | 46.5 |
| Modified Dunn procedure | - | - | 4 | 127.75 |
| Nuss bar procedure | 12 | 89.33 | 4 | 83 |
| Re-spondylodesis | - | - | 8 | 160.88 |
| Subtotal colectomy | 2 | 168.5 | 4 | 202 |
| Video-assisted thoracoscopic surgery (VATS) | 3 | 146 | 1 | 219 |
| Various surgical procedures performed 1 or 2 times | 72 | 109.7 | 76 | 144.1 |

*Mean postoperative length of stay (LOS) without adjustment for confounding.

# Figure 1 - Decision tree – Focus on Comfort

Decision tree: using focus language and comfort assessment for healthcare professionals.
